# Supplementary material for: Molecular Characterization of BRCA1 c.5339T>C Missense Mutation in DNA Damage Response of Triple-Negative Breast Cancer
Source: MDPI journal article supplement (doi:10.3390/cancers14102405), 2022-05-13
Supplement: s1 [file s1]

**A**

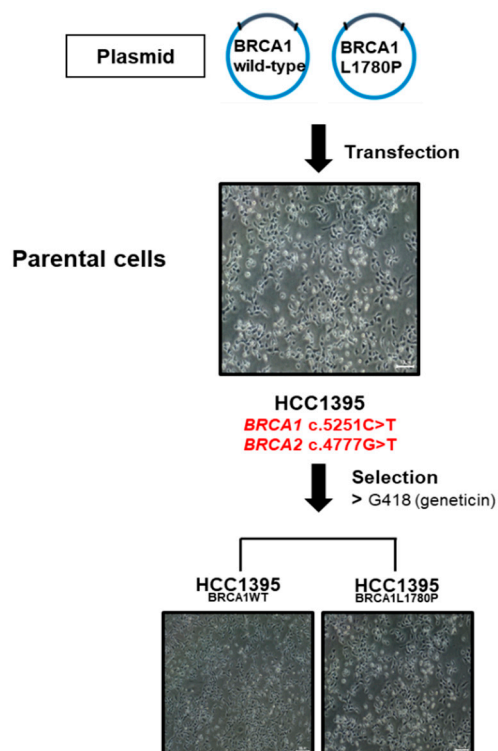

**B**

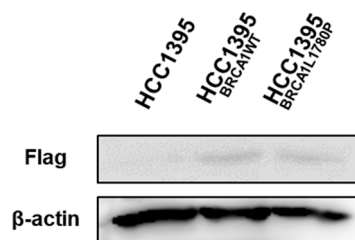

**C**

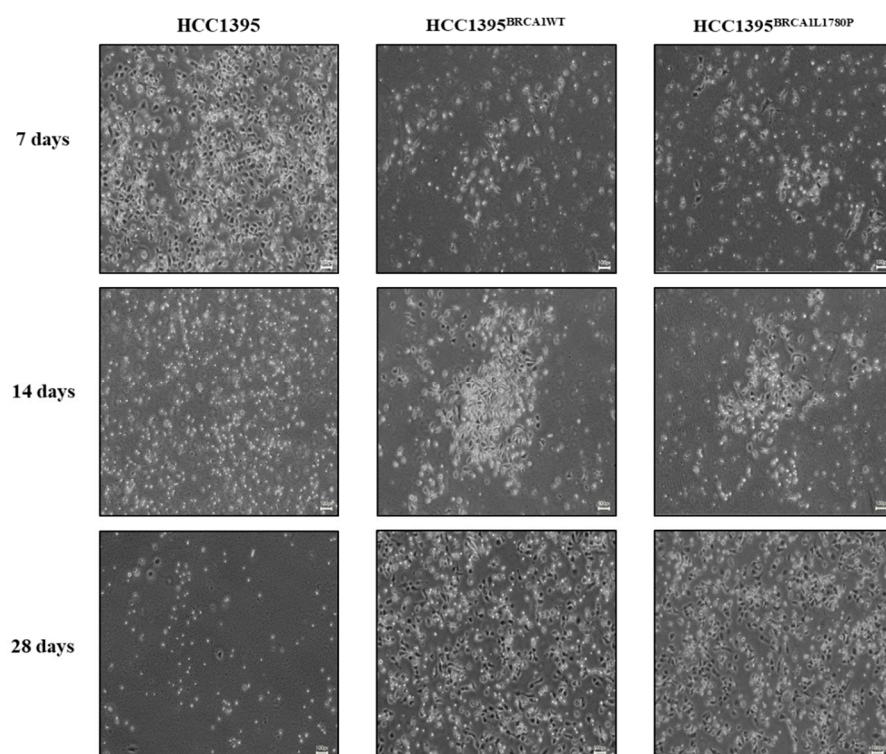

D

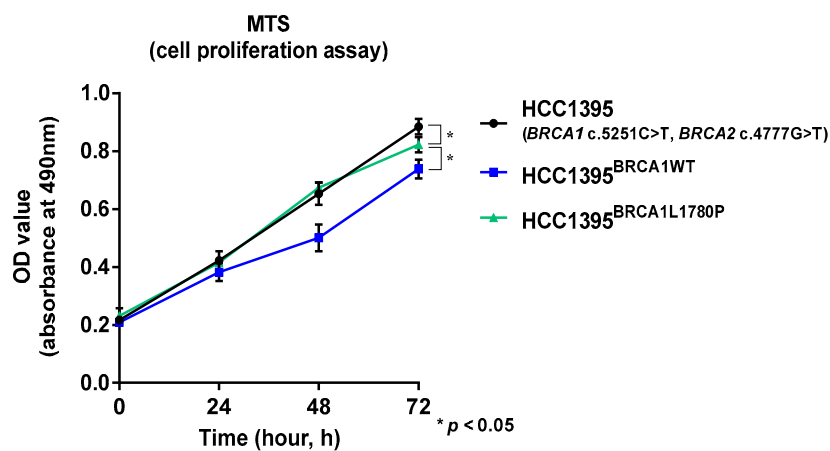

E

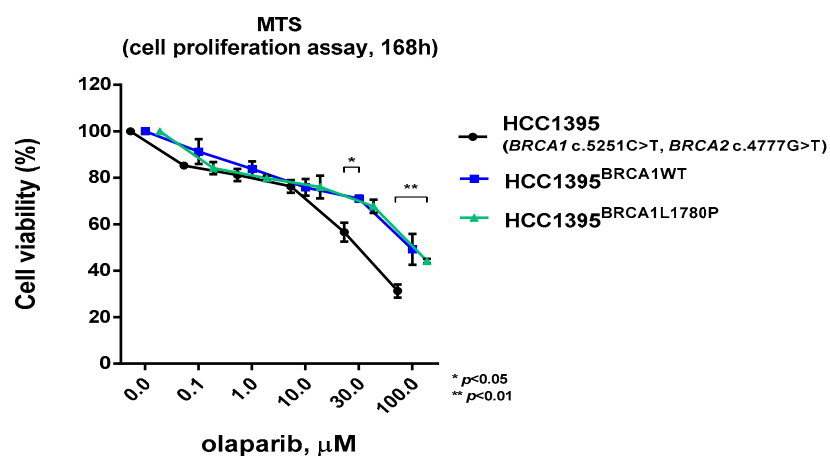

F

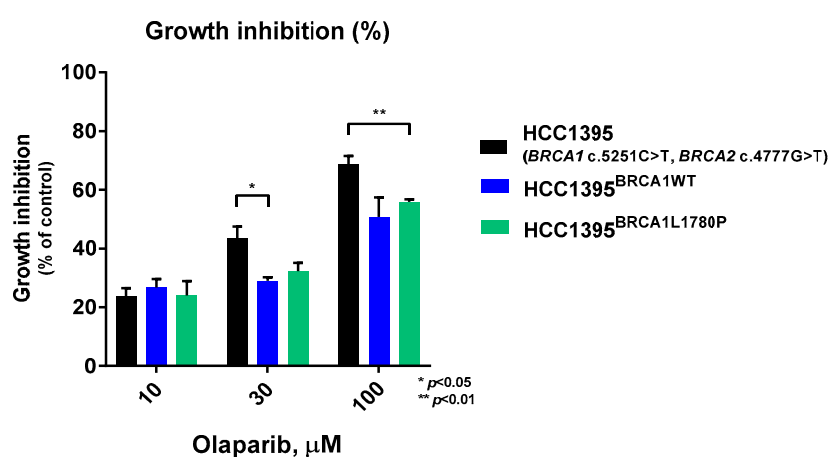

**Figure S1. Stable expression of exogenous *BRCA1* wild type and L1780P mutation in HCC1395 cells.**

(A) HCC1395 cells, which had *BRCA1* and *BRCA2* nonsense mutation also used to reveal the molecular

characteristics of BRCA1 L1780P mutation. (B) Anti-FLAG was detected by western blot. (C) Several time points of stably-transfected cell lines which were selected by geneticin. (D) HCC1395 parental and stably-transfected cells were used to cell proliferation assay. (E-F) Cell viability and growth inhibition following olaparib treatment in parental HCC1395 cells and stably-transfected cell lines. Data are reported as the mean  $\pm$  standard deviation (SD). Statistical analysis was performed using chi-square test. (\*  $p < 0.05$ , \*\*  $p < 0.01$ ).

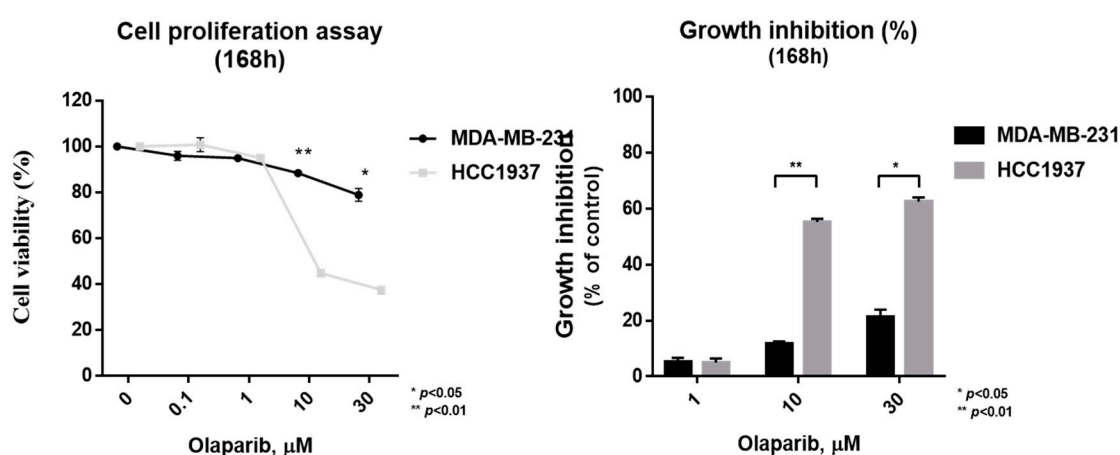

A  
C

B

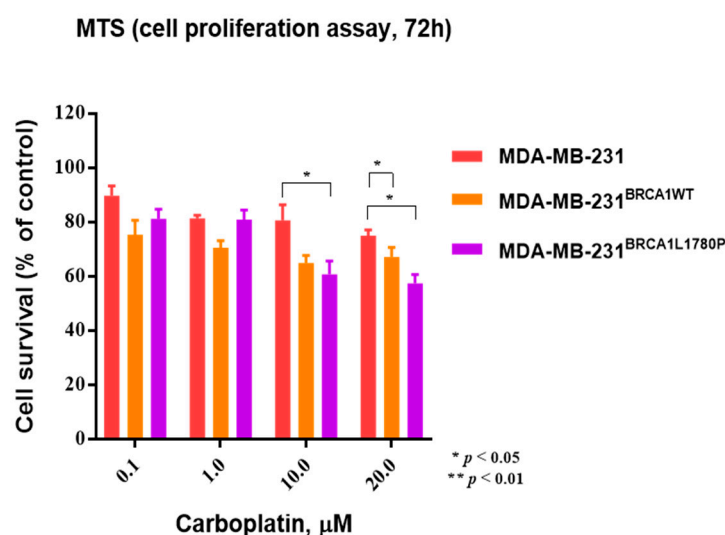

D

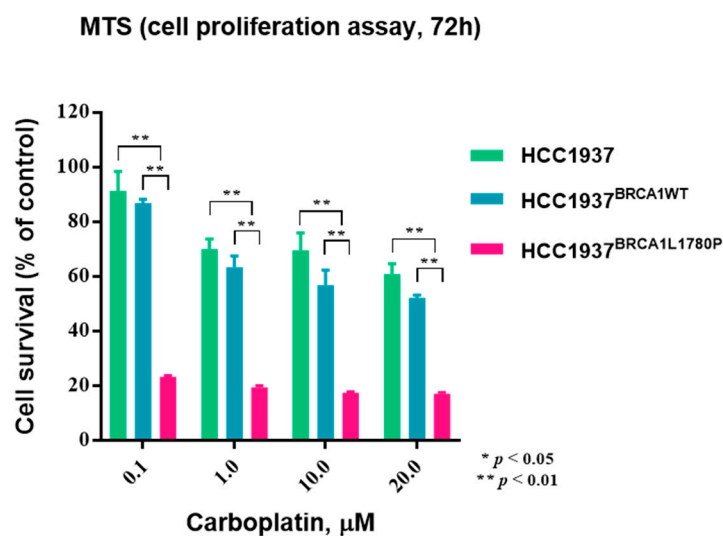

**Figure S2. Olaparib and carboplatin sensitivity in parental MDA-MB-231 and HCC1937 cells. (A-B)**

Cell viability and growth inhibition of parental MDA-MB-231 and HCC1937 cells upon olaparib treatment.

(C-D) Cell survival of parental MDA-MB-231 and HCC1937 cells and their stably-transfected cell lines upon carboplatin. Data are reported as the mean  $\pm$  standard deviation (SD). Statistical analysis was performed using chi-square test. (\*  $p < 0.05$ , \*\*  $p < 0.01$ ).

A

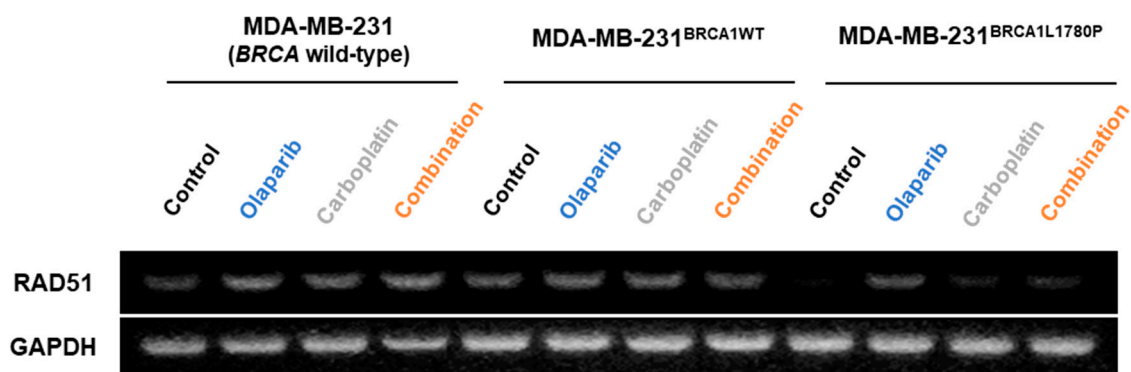

**B**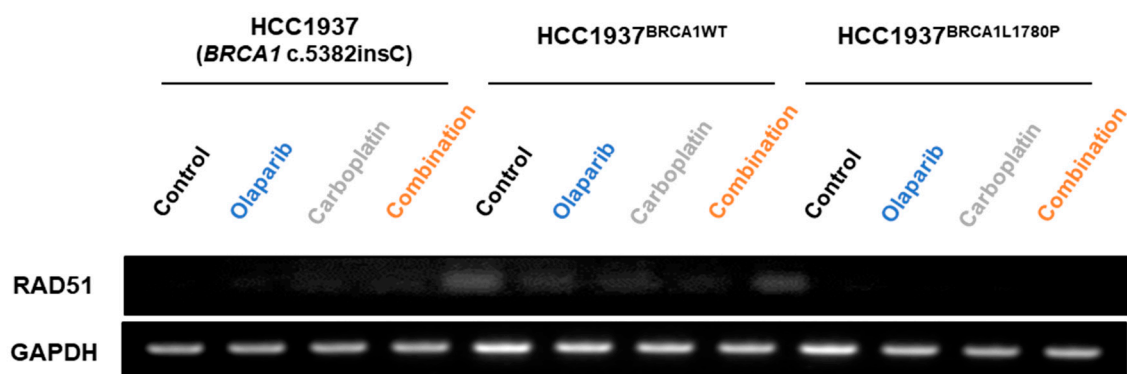

**Figure S3.** mRNA expression level of RAD51 was downregulated in *BRCA1* L1780P mutant cells upon combination treatment of olaparib and carboplatin. (A) MDA-MB-231 and exogenous *BRCA1* wild type cells showed normal expression of RAD51 upon olaparib and carboplatin treatment. However, *BRCA1* L1780P mutant cells showed significantly downregulated mRNA expression of RAD51. (B) HCC1937 cells, which had *BRCA1* nonsense mutation showed downregulated mRNA expression of RAD51 upon drug treatment. *BRCA1* L1780P mutant cells also showed downregulated mRNA expression of RAD51 upon drug treatment.

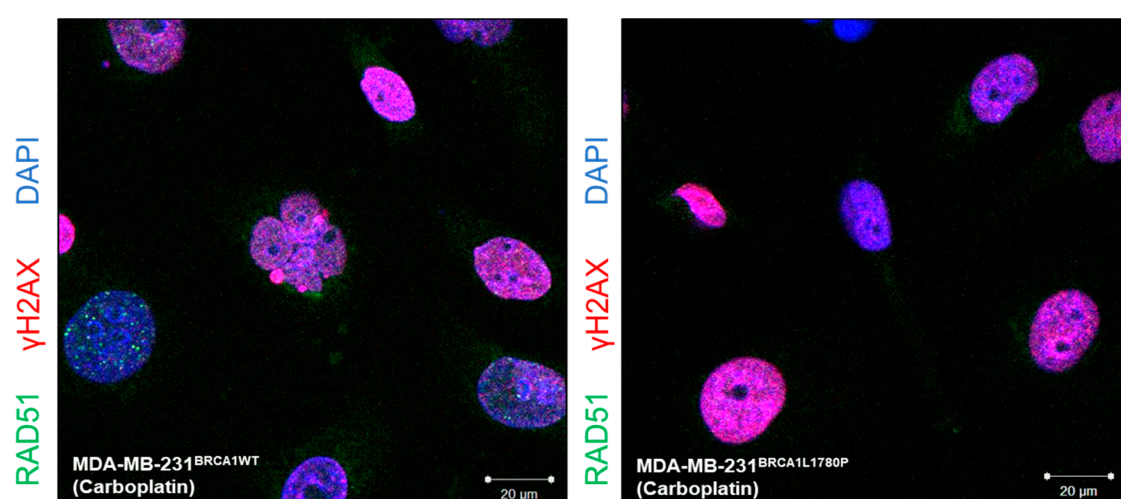**A**

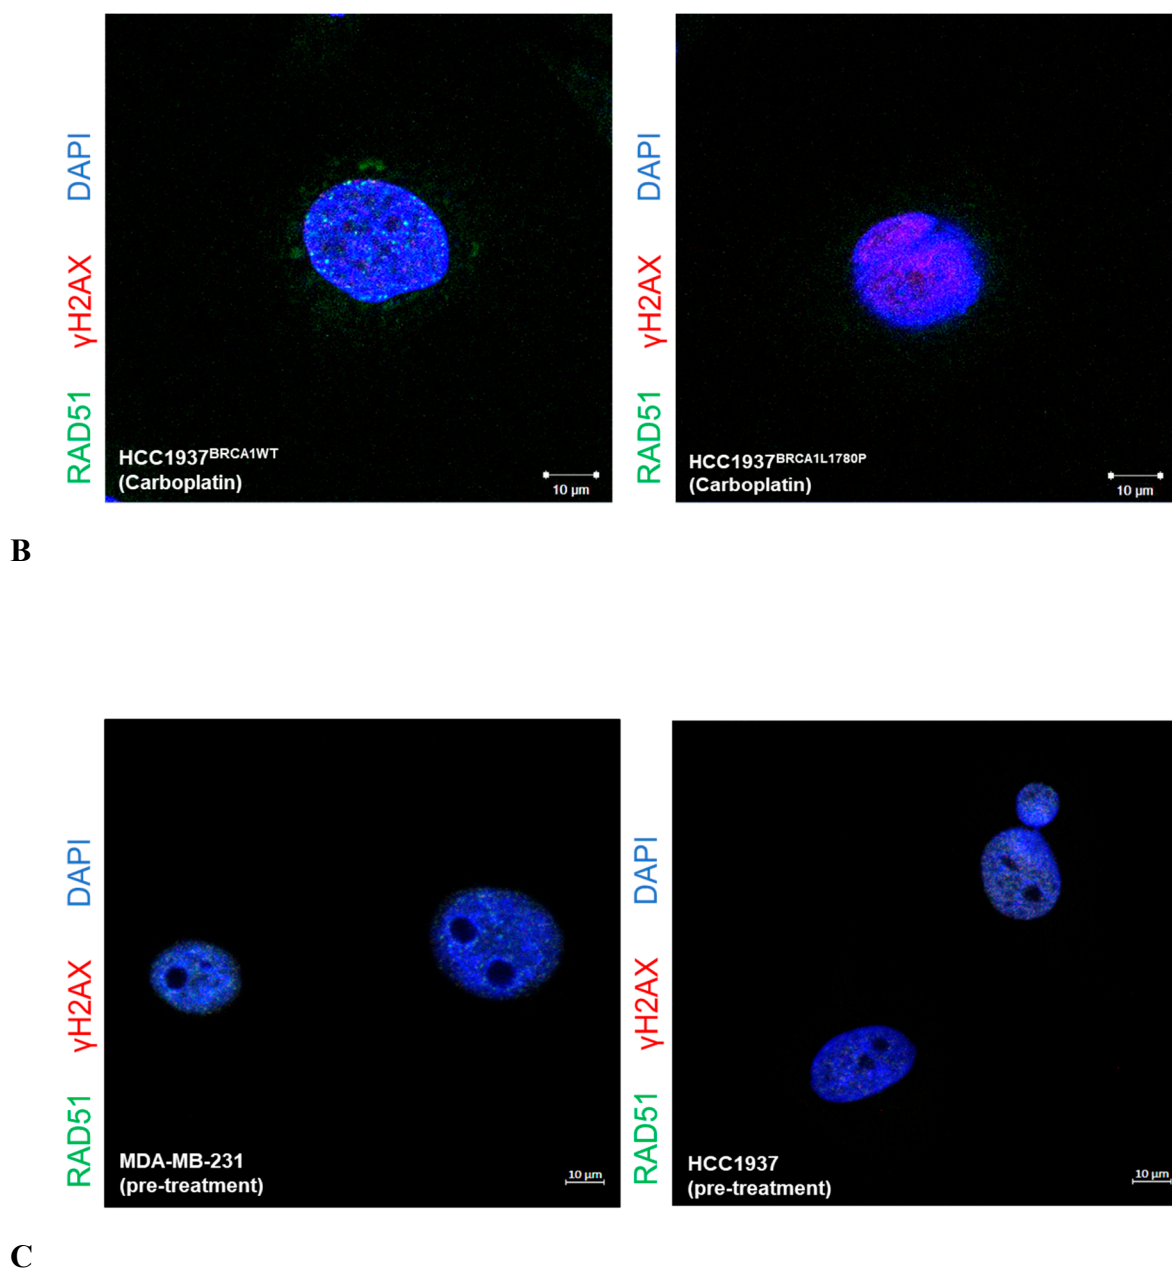

**Figure S4. RAD51 recruitment in cell nucleus of *BRCA1* stable expressing cells.** (A-B) RAD51 recruitment of cell nucleus in *BRCA1* wild type and L1780P mutant cells. Recruitment of RAD51 significantly decreased in *BRCA1* L1780P mutant cells upon carboplatin treatment. (C) pre-treatment status of parental cells.

A

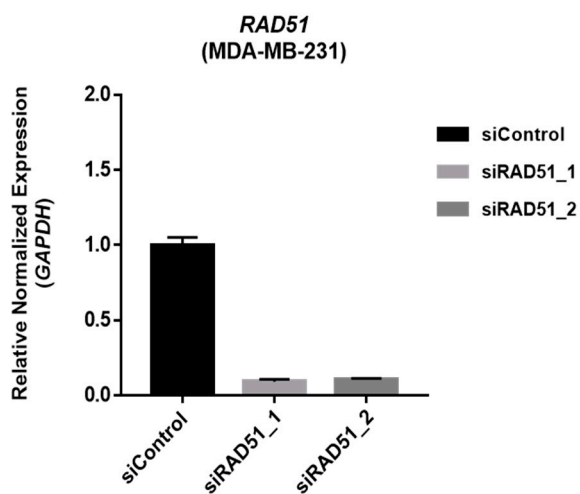

**Figure S5. RAD51 knock down in MDA-MB-231 cells.** (A) To evaluate the efficacy of RAD51 knock down, qRT-PCR was performed in MDA-MB-231 cells.

A

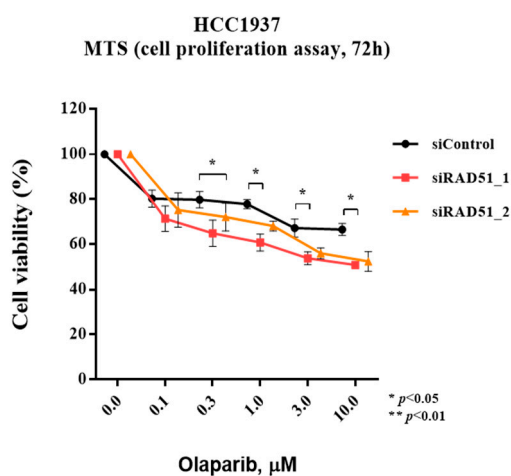

B

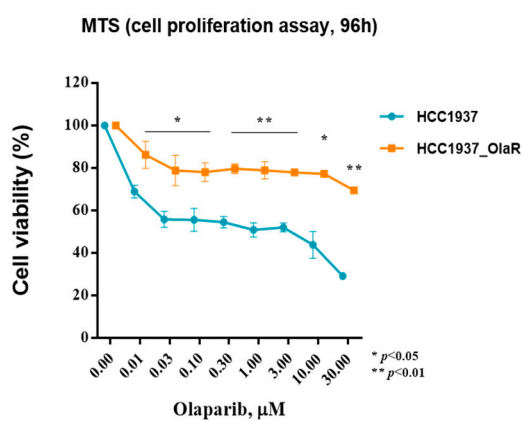

C

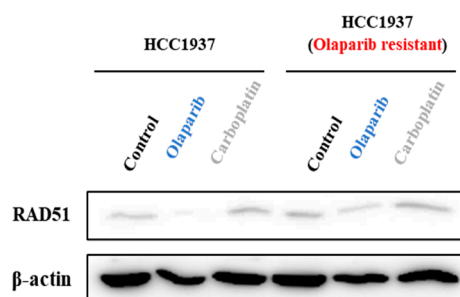



**Figure S6. Downregulation of RAD51 and olaparib resistance in parental HCC1937 cells.** (A) Downregulation of RAD51 expression affected sensitivity to olaparib in HCC1937 cells. (B) Olaparib-resistant cells derived from HCC1937 cells. (C) Upregulation of RAD51 expression affects olaparib resistance in HCC1937 cells. Data are reported as the mean  $\pm$  standard deviation (SD). Statistical analysis was performed using the chi-square test. (\*  $p < 0.05$ , \*\*  $p < 0.01$ ).

**Table S1.** Primary and secondary antibodies.

| Primary antibody          | Manufacturer              | Catalog Number | Dilution | Application |
|---------------------------|---------------------------|----------------|----------|-------------|
| $\beta$ -actin            | Abclon                    | AbC-2002       | 1:5000   | WB          |
| p-ATM                     | Abcam                     | ab81292        | 1:50000  | WB          |
| ATM                       | Bethyl Laboratories       | A300-299A      | 1:5000   | WB          |
| p-BRCA1                   | Bethyl Laboratories       | A300-001A      | 1:500    | WB          |
| BRCA1                     | Bethyl Laboratories       | A300-000A      | 1:1000   | WB          |
| RAD51                     | Cell Signaling Technology | #8875S         | 1:1000   | WB          |
| Monoclonal anti-Flag M2   | Sigma Aldrich             | F3165          | 1:2000   | WB          |
| $\gamma$ -H2AX            | Abcam                     | ab195189       | 1:200    | IF          |
| RAD51                     | Abcam                     | ab196449       | 1:100    | IF          |
| Geminin                   | Santa Cruz                | sc-74456       | 1:50     | IF          |
| mounting medium with DAPI | Vector laboratories       | H1200          |          | IF          |

| Secondary antibody               | Manufacturer        | Catalog Number | Dilution | Application |
|----------------------------------|---------------------|----------------|----------|-------------|
| HRP conjugated anti-mouse IgG    | Enzo Life Sciences  | ADI-SAB-100    | 1:2500   | WB          |
| HRP conjugated anti-rabbit IgG   | Enzo Life Sciences  | ADI-SAB-300    | 1:5000   | WB          |
| HRP conjugated anti-goat IgG     | Bethyl Laboratories | A50-101P       | 1:5000   | WB          |
| Mouse IgG-heavy and light chain  | Bethyl Laboratories | A90-516C3      | 1:50     | IF          |
| Rabbit IgG-heavy and light chain | Bethyl Laboratories | A120-101F      | 1:50     | IF          |
